# Supplementary material for: The interactive effect of herbivory, nutrient enrichment and mucilage on shallow rocky macroalgal communities
Source: PeerJ. 2019 May 13;7:e6908. doi: 10.7717/peerj.6908 (PMC6521808; doi:10.7717/peerj.6908)
Supplement: Dataset S1 — The file contains the complete detailed raw data regarding the percent cover of different macroalgae on the substratum in the 3 sampling times (T0-T2). [file peerj-07-6908-s001.xlsx]

## Sheet: T0-T1
Time	Treatment	Replicate	Dictyotales	Laurencia sp	Dasycladus sp.	Corallinaceae	DFA	Acetabularia acetabulum	Padina pavonica	Liagora sp.	Ulva lactuca
T0	E+G100%	1	0	0	0	0	0	0	0	0	0
T0	E+G100%	2	0	0	0	0	0	0	0	0	0
T0	E+G100%	3	0	0	0	0	0	0	0	0	0
T0	E+M+G100%	1	0	0	0	0	0	0	0	0	0
T0	E+M+G100%	2	0	0	0	0	0	0	0	0	0
T0	E+M+G100%	3	0	0	0	0	0	0	0	0	0
T0	E+G50%	1	1	3	0	4	39	3	0	0	0
T0	E+G50%	2	6.5	1	0	5.5	36	1	0	0	0
T0	E+G50%	3	4.5	4	3.5	5	31	2	0	0	0
T0	E+M+G50%	1	2	6	0	3.5	34.5	3	1	0	0
T0	E+M+G510%	2	1.5	5.5	0	5.5	36	1.5	0	0	0
T0	E+M+G520%	3	0	3.5	0.5	13.5	28	4.5	0	0	0
T0	E+G0%	1	0	3.5	0	25.5	68.5	2.5	0	0	0
T0	E+G0%	2	0	7	0	27	64.5	1.5	0	0	0
T0	E+G0%	3	4	13.5	1	17	63	1	0	0.5	0
T0	E+M+G0%	1	9.5	11.5	3	22.5	50	3	0	0	0.5
T0	E+M+G0%	2	0	0	0	34	66	0	0	0	0
T0	E+M+G0%	3	17	11	1.5	31	37	2.5	0	0	0
T0	E-M-G100%	1	0	0	0	0	0	0	0	0	0
T0	E-M-G100%	2	0	0	0	0	0	0	0	0	0
T0	E-M-G100%	3	0	0	0	0	0	0	0	0	0
T0	E-MG100%	1	0	0	0	0	0	0	0	0	0
T0	E-MG100%	2	0	0	0	0	0	0	0	0	0
T0	E-MG100%	3	0	0	0	0	0	0	0	0	0
T0	E-M-G50%	1	0.5	3.5	0	4.5	38.5	3	0	0	0
T0	E-M-G50%	2	5	0	0	5	39	1	0	0	0
T0	E-M-G50%	3	4.5	5.5	3.5	4.5	29	3	0	0	0
T0	E-MG50%	1	0	4.5	0	7	35.5	3	0	0	0
T0	E-MG50%	2	2.5	5	0	6.5	34	2	0	0	0
T0	E-MG50%	3	0	2.5	0.5	13	29.5	4.5	0	0	0
T0	E-M-G0%	1	3.5	11	0	18.5	60	6	1	0	0
T0	E-M-G0%	2	1.5	14.5	0	15.5	59	9.5	0	0	0
T0	E-M-G0%	3	0	1.5	0	12	76.5	10	0	0	0
T0	E-MG0%	1	3	14.5	0	13	58	11.5	0	0	0
T0	E-MG0%	2	1.5	4.5	0	11	77	6	0	0	0
T0	E-MG0%	3	7	4	0	13.5	70.5	5	0	0	0
T1	100N1		2	0	2	0	65.5	1	0	0	0
T1	100N2		3.5	0	2	7	54.5	0	0	0	0
T1	100N3		0.5	4.5	0	9.5	58.5	2	0	0	0
T1	100NM1		1	3.5	0	8.5	49	0	0	0	0
T1	100NM2		1	5.5	0	7.5	53	1	0	0	0
T1	100NM3		1.5	2.5	0	11.5	49.5	1	0	0	0
T1	50N1		0	4.5	2.5	7	48.5	0.5	0	0	0
T1	50N2		2.5	2.5	1	12.5	45	1	0	0	0
T1	50N3		3	3	2.5	9.5	51	0	0	0	0
T1	50NM1		1.5	1.5	0	4.5	49.5	1	0	0	0
T1	50NM2		0.5	5	0	4.5	51.5	0	0	0	0
T1	50NM3		1.5	4	0	5.5	55.5	0	0	0	0
T1	CN1		14.5	14.5	0	14.5	38	0.5	3	1	0
T1	CN2		10	9.5	0.5	21	43	0	2	0	0
T1	CN3		6.5	11.5	0	16	46.5	0	2.5	3	0
T1	CNM1		11.5	19.5	0	15	39.5	0	0	2	0
T1	CNM2		10	11.5	0	18.5	36.5	0	7.5	3.5	0
T1	CNM3		12.5	16	0	16	34.5	0	6	0	0
T1	1001		0	1.5	0	4	55.5	0	0	0	0
T1	1002		0.5	1.5	0	2	53.5	0	0	0	0
T1	1003		2	1	0	3	49.5	0	0	0	0
T1	100M1		0.5	1	0	3.5	48	0	0	0	0
T1	100M2		1.5	0.5	0	1	48	1	0	0	0
T1	100M3		0.5	0.5	0	4	55	0.5	0	0	0
T1	501		5.5	1.5	0	4.5	55.5	0	0	0	0
T1	502		5.5	1	0	4.5	35.5	1	0	0	0
T1	503		6	2	0	3	65.5	0	0	0	0
T1	50M1		4.5	0.5	0	4	50	1.5	0	0	0
T1	50M2		3	0	0	3	49.5	0.5	0	0	0
T1	50M3		5.5	0	0	2.5	52	0	0	0	0
T1	C1		9	5.5	0	7	59.5	0	0	0	0
T1	C2		6	4.5	0	10	64	0.5	0	0	0
T1	C3		4	2.5	0	7	73	0.5	0	0	0
T1	CM1		2	0.5	0	4.5	56	0.5	0	0	0
T1	CM2		12	3	0	4.5	42	0.5	0	0	0
T1	CM3		6	1.5	0	5	44	0.5	0	0	0
T0 data are relative to the beginning of the experiment afirst half of July 2014
T1 data area relative to the end of the first part of the experiment (first half of September 2014) and were used to evaluate the short-term macroalgal response to disturbance
E+ = enriched units
E- = non-entiched units
G100% = total macroalgal removal units
G 50% = partial macroalga removal units
G0% = no macroalgal removal units
M+ = mucilage removal units
M- = units with mucilage

## Sheet: T2
Time	Treatment	Replicate	Dictyotales	Laurencia sp.	Corallinaceae	DFA	Acetabularia acetabulum	Padina pavonica
T2	E+G100%	1	0.5	1.5	14.5	41	0	0
T2	E+G100%	2	0	1	14	42.5	0	0
T2	E+G100%	3	0.5	2	14.5	42.5	1	0
T2	E+M+G100%	1	0	2	14.5	42	0	0.5
T2	E+M+G100%	2	0.5	1.5	15.5	43	1	0
T2	E+M+G100%	3	0	2.5	14.5	41.5	0	0
T2	E+G50%	1	0.5	2	14.5	40.5	0.5	0.5
T2	E+G50%	2	0	1	14.5	41	1	0
T2	E+G50%	3	0	1	13.5	41	0	0
T2	E+M+G50%	1	0	1.5	13.5	42.5	0.5	0
T2	E+M+G510%	2	0.5	2	13	41.5	0	0
T2	E+M+G520%	3	0	1.5	13.5	43.5	0	0
T2	E+G0%	1	0.5	2	14.5	43	0.5	0.5
T2	E+G0%	2	0	2.5	14	41	0	0
T2	E+G0%	3	0.5	1	15.5	42.5	0	0
T2	E+M+G0%	1	0	2	14	41.5	0	0
T2	E+M+G0%	2	0	2.5	15.5	42	0	0.5
T2	E+M+G0%	3	0.5	2	14.5	43.5	0	0.5
T2	E-M-G100%	1	0	2.5	14	42.5	0	0
T2	E-M-G100%	2	0.5	1.5	13.5	41	0	0
T2	E-M-G100%	3	0	1	13.5	43.5	0	0
T2	E-MG100%	1	0	2	13.5	42	0	0
T2	E-MG100%	2	0	2	14.5	42	0.5	0
T2	E-MG100%	3	0	2	14.5	41	0.5	0
T2	E-M-G50%	1	0	1.5	14.5	41	0	0
T2	E-M-G50%	2	0.5	1	14	43.5	1	0
T2	E-M-G50%	3	0	2	13.5	41.5	0	0
T2	E-MG50%	1	0	1.5	14	42	0.5	0
T2	E-MG50%	2	0.5	1	13.5	41.5	0.5	0
T2	E-MG50%	3	0.5	2.5	13.5	43	0	0.5
T2	E-M-G0%	1	0	1.5	14	42.5	0	0
T2	E-M-G0%	2	0	2.5	14.5	41.5	0.5	0
T2	E-M-G0%	3	0	2	15	42.5	0	0
T2	E-MG0%	1	0	1.5	15.5	43	0.5	0
T2	E-MG0%	2	0	2	14.5	43	0	0
T2	E-MG0%	3	0.5	1.5	15	41.5	0	0.5
T2 data area relative to the end of the second part of the experiment (second part of March 2015) and they were used to evaluate the long-term macroalgal response to disturbance
E+ = enriched units
E- = non-entiched units
G100% = total macroalgal removal units
G 50% = partial macroalga removal units
G0% = no macroalgal removal units
M+ = mucilage removal units
M- = units with mucilage
